# Supplementary material
Source: PubMed Central journal article supplement (PMC3250161)
Supplement: 1108487108_pnas.201108487SI.pdf [file 1108487108_pnas.201108487SI.pdf]

# Supporting Information

Weick et al. 10.1073/pnas.1108487108

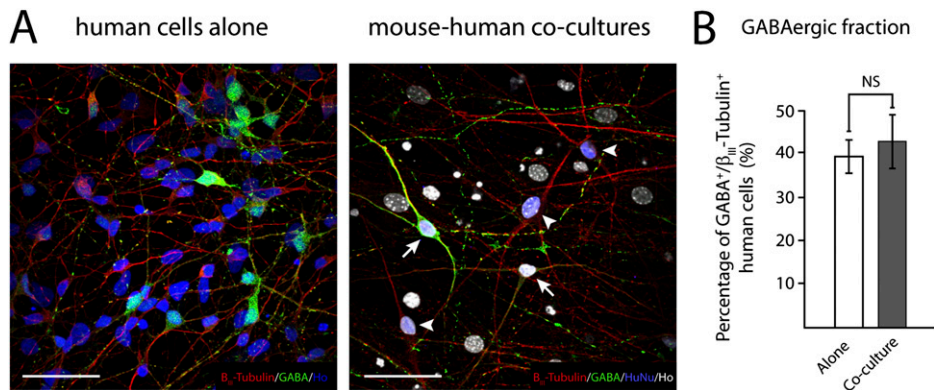

**Fig. S1.** hESC-derived forebrain cultures contain significant numbers of GABAergic neurons. (A) Confocal images of 6-wk-old human cultures alone (Left) and mouse-human cultures (Right) that display GABA<sup>+</sup> neurons (green). Note that in cocultures, GABA<sup>+</sup> cells (arrows) and GABA<sup>-</sup> cells (arrowheads) express the human-specific nuclear antigen (blue). (B) Pooled data demonstrate that hESC-derived cultures are comprised of ~40% GABAergic neurons, which is not affected by coculture with mouse cortical cells.

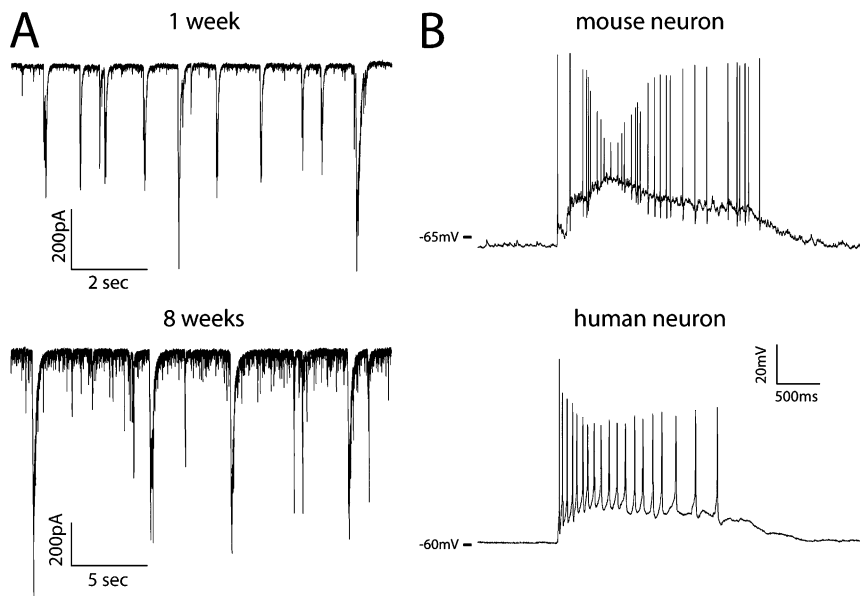

**Fig. S2.** Spontaneous bursting is maintained in mouse cortical networks for at least 2 mo. (A) Representative whole cell recordings (−70-mV holding potential) from mouse cortical neurons at 1 wk (upper trace) and 8 wk (lower trace) in vitro. (B) Representative traces from mouse (Upper) and human (Lower) that illustrate “superbursts” in each cell type.



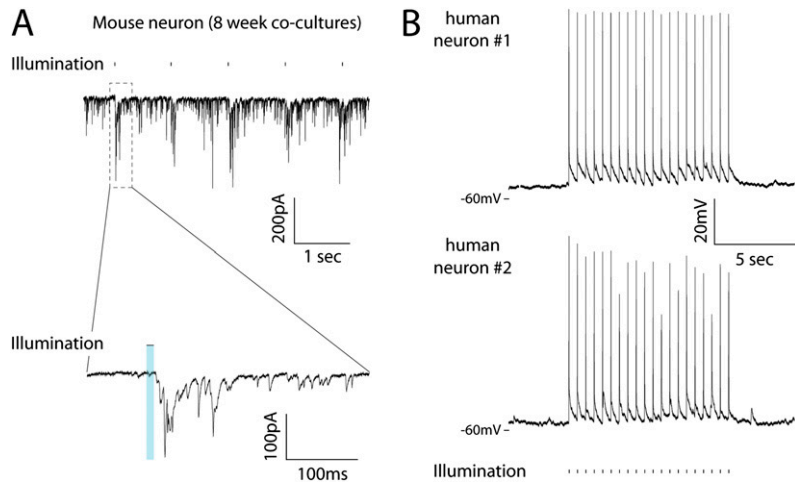

**Fig. 55.** Multiple postsynaptic currents are triggered in individual mouse neurons during light stimulation. (*A*) Whole-cell recording from a mouse cortical neuron during brief (10-ms) light stimulations. Lower trace reveals multicomponent, large-amplitude postsynaptic responses between ~10 and 100 ms following an individual light stimulation. (*B*) Whole-cell patch-clamp recordings from two hESC-derived neurons in coculture with mouse neurons for 8 wk illustrates simultaneous AP generation in both cells upon light stimulation.

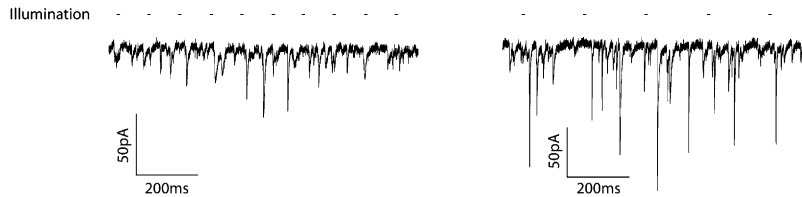

**Fig. 56.** Spontaneous postsynaptic currents make light-induced currents difficult to detect in some neurons. Representative traces from two different mouse cortical neurons during light stimulation after 6 wk in coculture with Chr2-expressing human neurons.

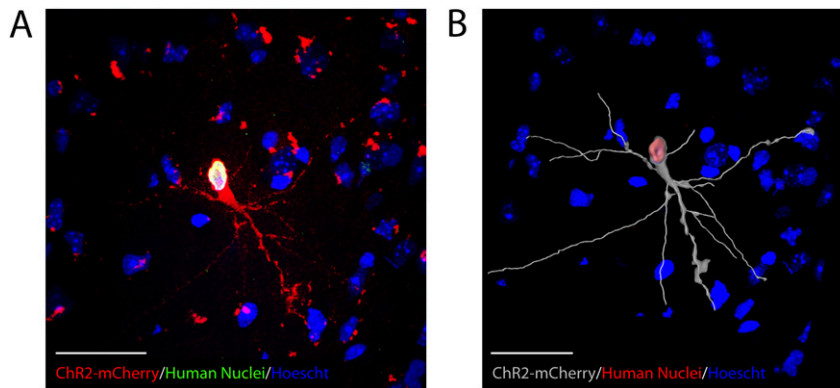

**Fig. 57.** Morphology of transplanted hESC-derived neurons. (*A*) Compressed confocal z-stack of a transplanted hESC-derived neuron expressing both Chr2-mCherry and the human nuclear antigen. (*B*) 3D reconstruction of the neuron in *A* demonstrating multipolar morphology. Scale bars, 50 μm.

**Table S1. Basic physiological properties of hESC-derived neurons in coculture with mouse cortical cultures**

|       | Cap (pF)       | Rin (G $\Omega$ ) | RMP (mV)        |
|-------|----------------|-------------------|-----------------|
| 2 wk  |                |                   |                 |
| (M)   | 85.6 $\pm$ 5.3 | 0.23 $\pm$ 0.05   | -70.9 $\pm$ 2.4 |
| (H)   | 22.6 $\pm$ 2.4 | 1.5 $\pm$ 0.1     | -46.3 $\pm$ 1.7 |
| 4 wk  |                |                   |                 |
| (M)   | 87.6 $\pm$ 6.6 | 0.19 $\pm$ 0.04   | -68.4 $\pm$ 4.9 |
| (H)   | 26.9 $\pm$ 2.5 | 1.1 $\pm$ 0.1     | -57.1 $\pm$ 2.1 |
| 6 wk  |                |                   |                 |
| (M)   | 92.1 $\pm$ 7.2 | 0.22 $\pm$ 0.04   | -72.3 $\pm$ 2.9 |
| (H)   | 30.9 $\pm$ 3.1 | 1.0 $\pm$ 0.2     | -60.2 $\pm$ 3.7 |
| 8 wk: |                |                   |                 |
| (M)   | 90.1 $\pm$ 6.3 | 0.19 $\pm$ 0.03   | -71.4 $\pm$ 3.2 |
| (H)   | 34.4 $\pm$ 4.1 | 0.9 $\pm$ 0.1     | -61.7 $\pm$ 4.2 |

H, human; M, mouse.
